# Supplementary material for: Plasma-based organ-specific aging and mortality models unveil diseases as accelerated aging of organismal systems
Source: bioRxiv or medRxiv preprint supplement (doi:10.1101/2024.04.08.24305469), 2024-04-10
Supplement: Supplementary file [file media-1.pdf]

## Supplementary figures

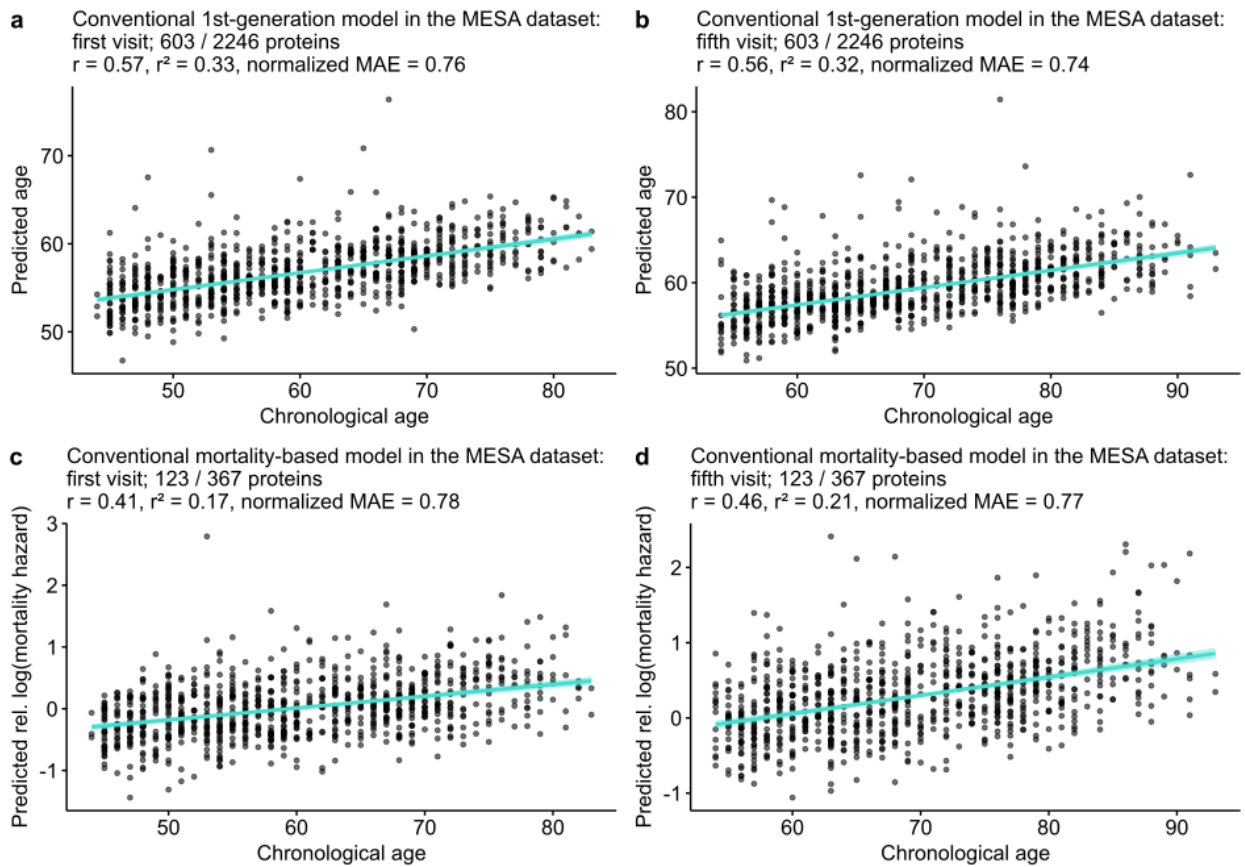

**Supplementary Figure 1. The conventional 1<sup>st</sup>-generation model and the conventional mortality-based model predict chronological age in the SomaScan proteomics from the external MESA study (Bild et al., 2002), even if not all proteins are present in the dataset. a – b.** Biological age as predicted by our 1st-generation proteome aging model has a strong positive correlation with chronological age in the MESA dataset, both in the SomaScan proteomics collected at the first (a) and the fifth visits (b) ( $n = 921$  participants each). **c – d.** Biological age as predicted by our mortality-based proteome aging model has a strong positive correlation with chronological age in the MESA dataset, both in the SomaScan proteomics collected at the first (a) and the fifth visits (b) ( $n = 921$  participants each). In all panels, the number of proteins from the aging models with non-zero coefficients used in the SomaScan dataset is shown as a fraction of the total number of proteins with non-zero coefficients for the aging models.  $r$ : correlation coefficient,  $r^2$ : coefficient of determination, normalized MAE: mean absolute error of the normalized residuals, magenta: women, blue: men. Robust regression lines with 95% confidence bands (shaded area) are added.

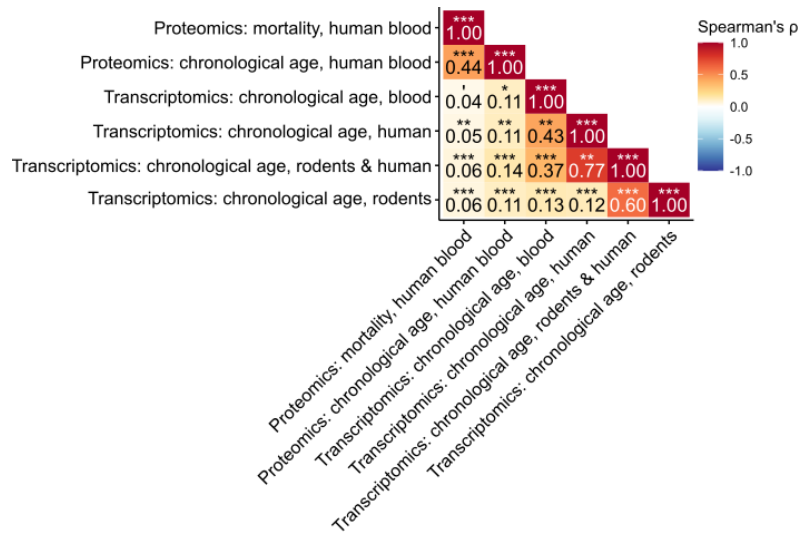

**Supplementary Figure 2. Correlation of proteomic and transcriptomic signatures/biomarkers of chronological age and mortality.** Heatmap showing the correlation coefficients ( $r$ ) at the protein- or gene-level between the protein-level analysis for chronological age, the protein-level analysis for mortality, and several transcriptomic associations with chronological age derived from Tyshkovskiy et al. (2023).

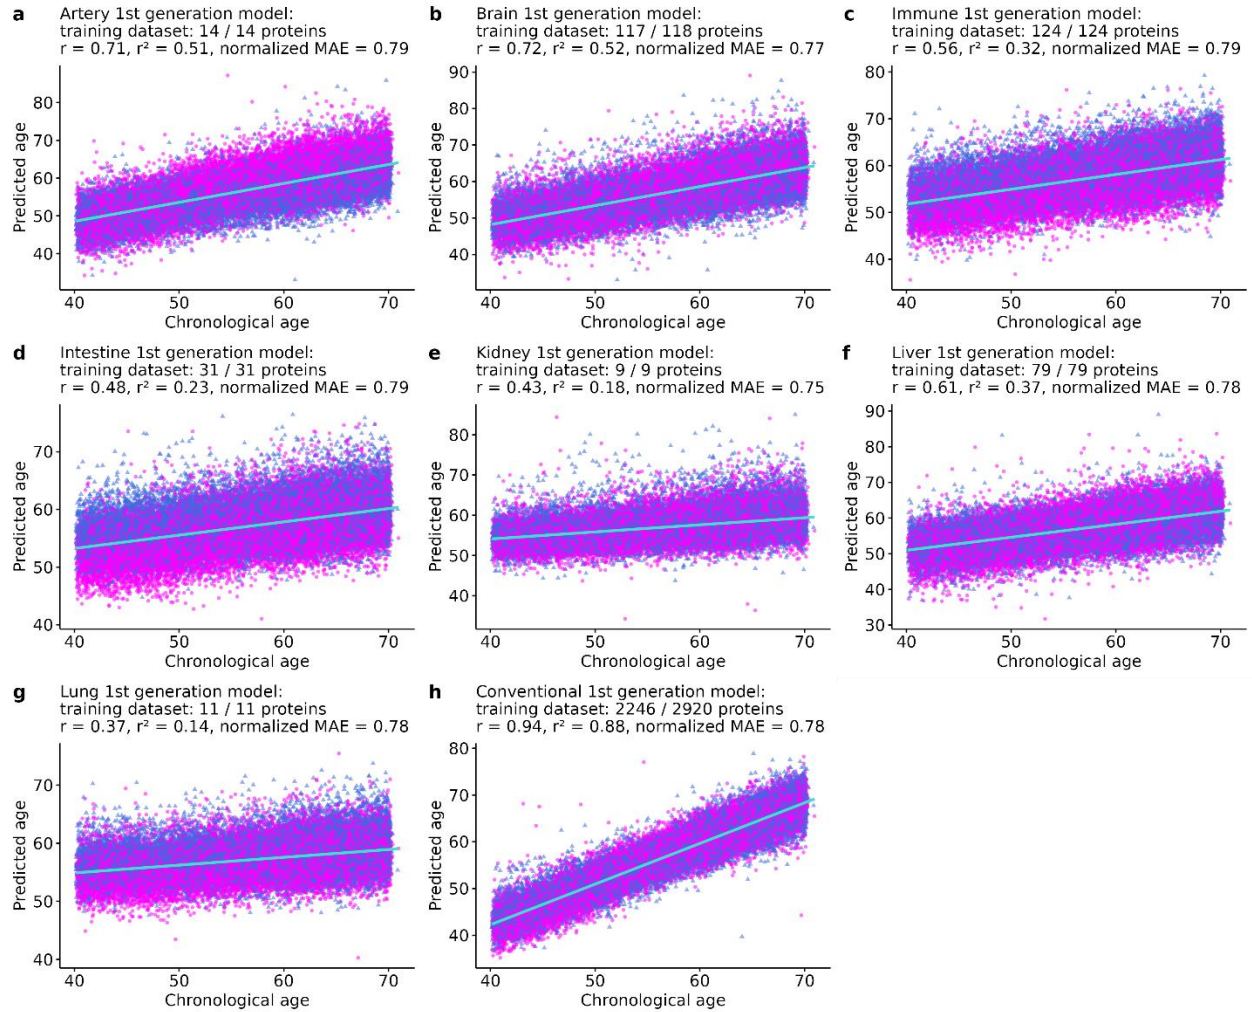

**Supplementary Figure 3. Predicted biological age correlates positively with chronological age in the training dataset ( $n = 42,412$  UK Biobank participants) for all organ-specific 1<sup>st</sup>-generation aging models.**  $r$ : correlation coefficient,  $r^2$ : coefficient of determination, normalized MAE: mean absolute error of the normalized residuals, magenta: women, blue: men. Robust regression lines with 95% confidence bands (shaded area) are added.

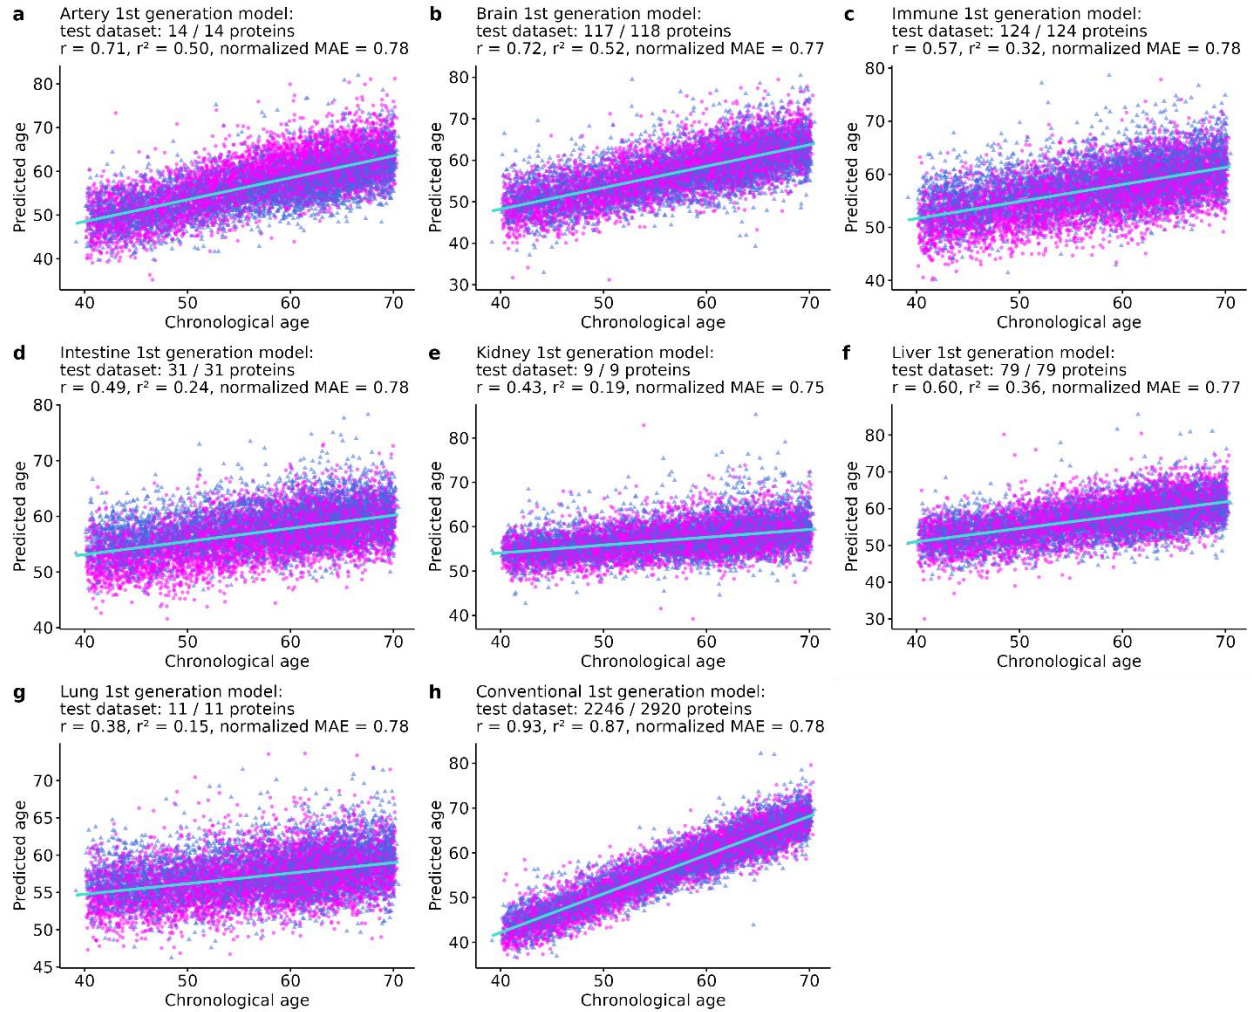

**Supplementary Figure 4. Predicted biological age correlates positively with chronological age in the test dataset ( $n = 10,603$  UK Biobank participants) for all organ-specific 1<sup>st</sup>-generation aging models.**  $r$ : correlation coefficient,  $r^2$ : coefficient of determination, normalized MAE: mean absolute error of the normalized residuals, magenta: women, blue: men. Robust regression lines with 95% confidence bands (shaded area) are added.

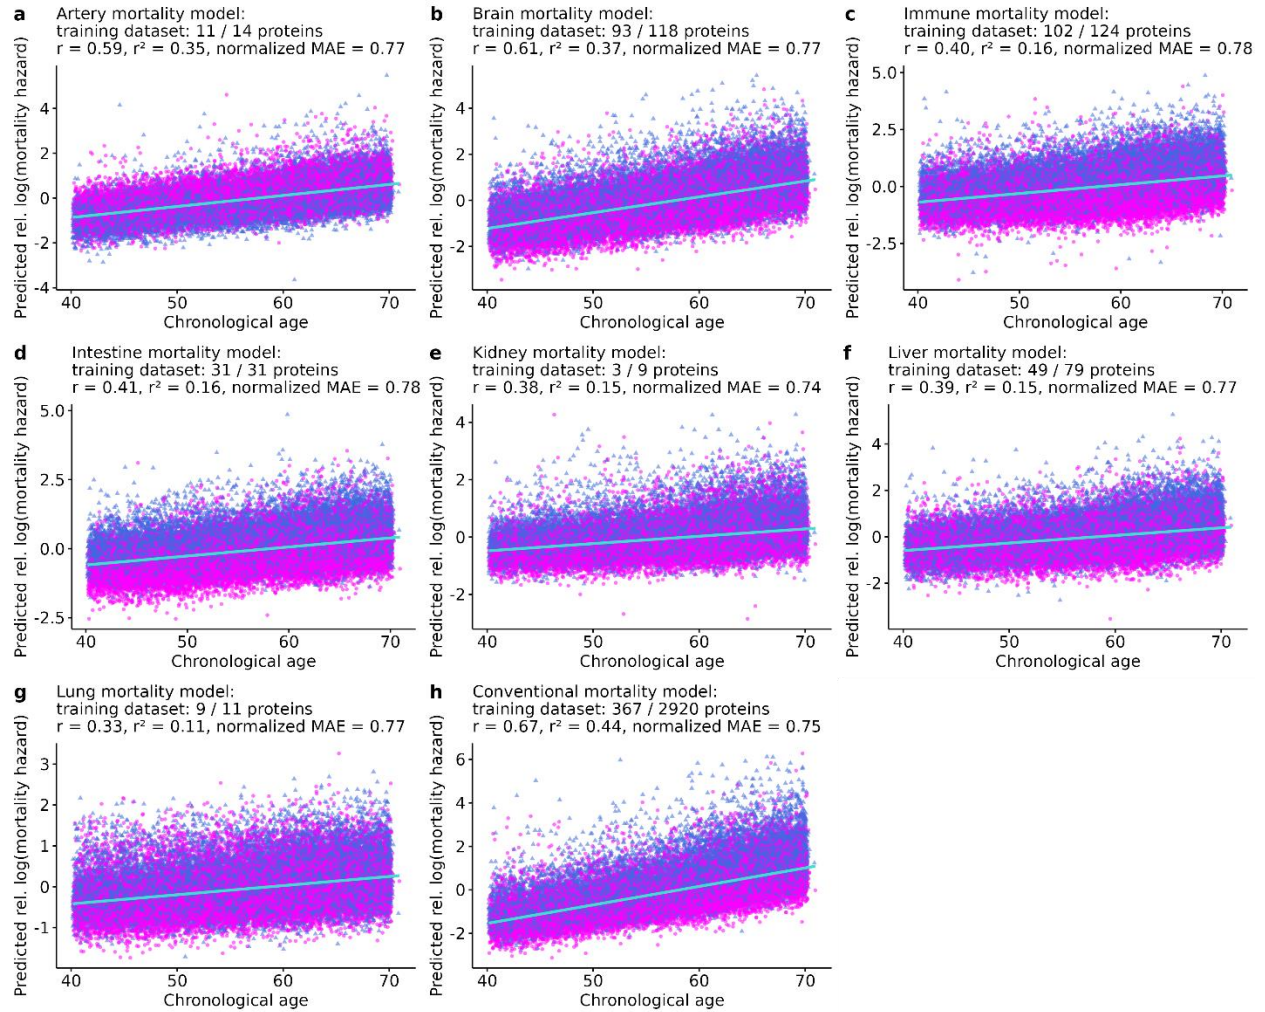

**Supplementary Figure 5. Predicted relative log(hazard) of mortality correlates positively with chronological age in the training dataset ( $n = 42,412$  UK Biobank participants) for all mortality-based aging models.**  $r$ : correlation coefficient,  $r^2$ : coefficient of determination, normalized MAE: mean absolute error of the normalized residuals, magenta: women, blue: men. Robust regression lines with 95% confidence bands (shaded area) are added.

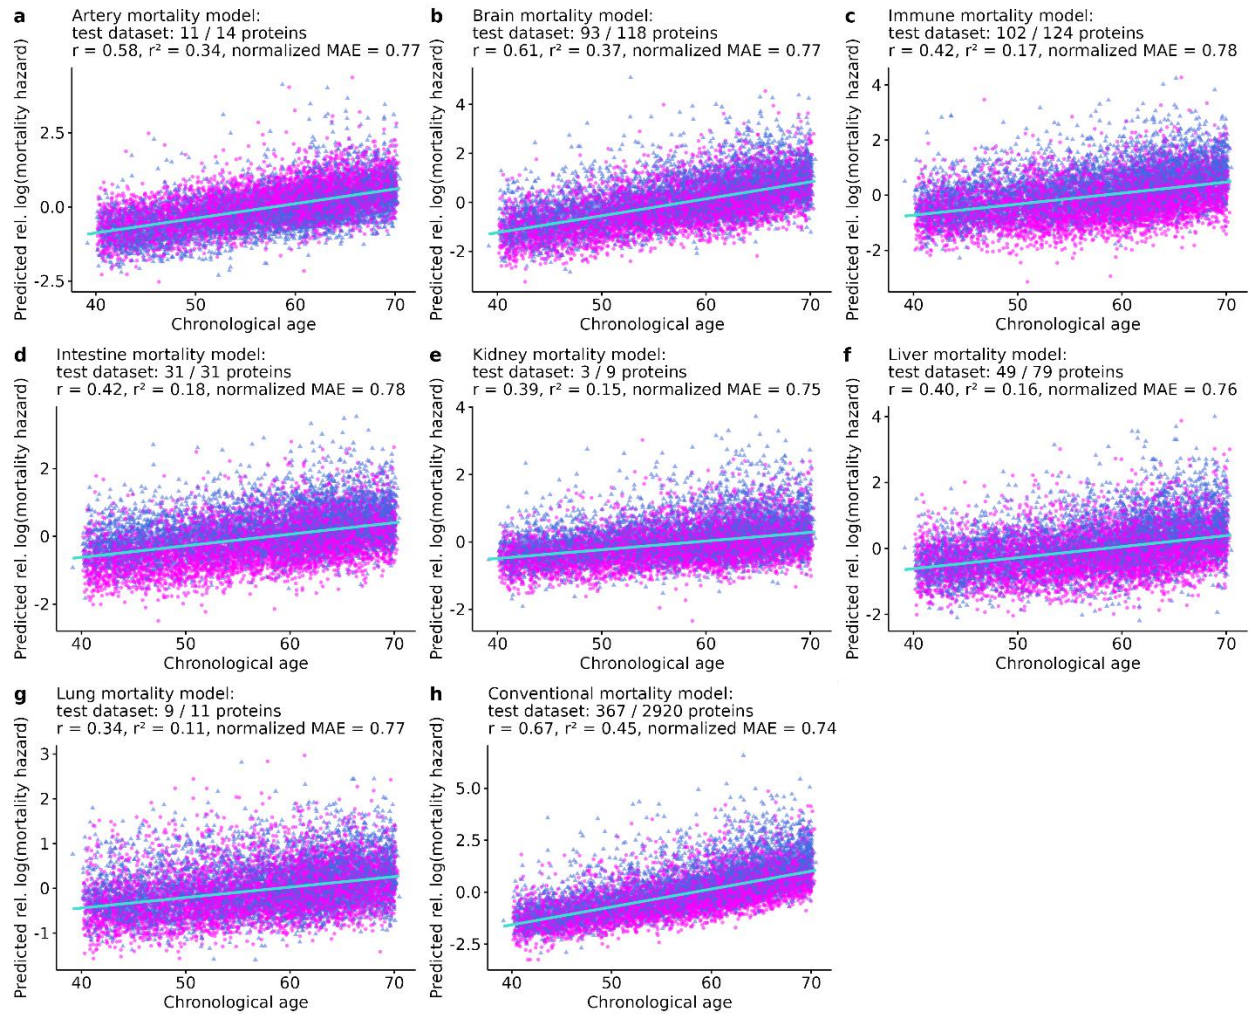

**Supplementary Figure 6. Predicted relative log(hazard) of mortality correlates positively with chronological age in the test dataset ( $n = 10,603$  UK Biobank participants) for all mortality-based aging models.**  $r$ : correlation coefficient,  $r^2$ : coefficient of determination, normalized MAE: mean absolute error of the normalized residuals, magenta: women, blue: men. Robust regression lines with 95% confidence bands (shaded area) are added.

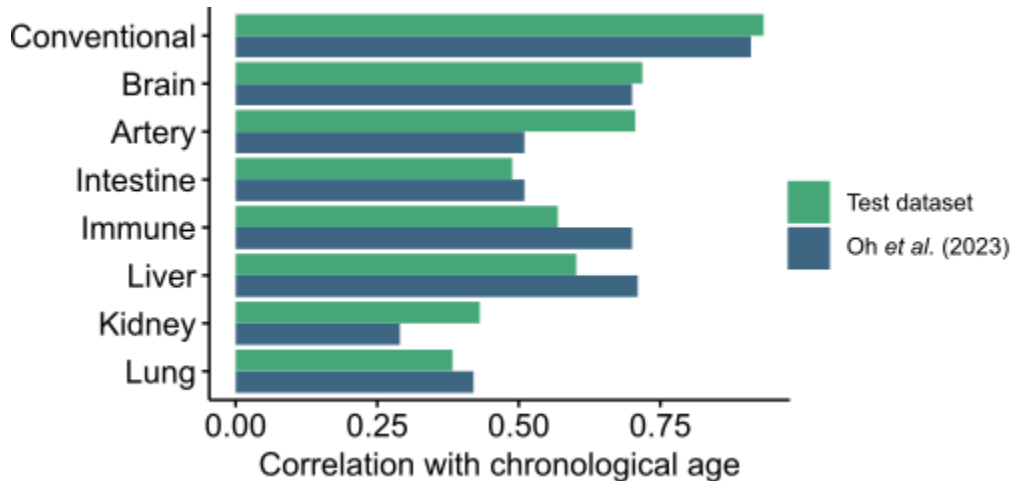

**Supplementary Figure 7. Organ-specific aging models predict chronological age.** Bar plots showing the correlation coefficients ( $r$ ) with chronological age for the predicted ages by the conventional and organ-specific 1<sup>st</sup>-generation aging models in the test dataset ( $n = 10,603$  UK Biobank participants), and the correlation coefficients with chronological age reported by Oh et al. (2023).

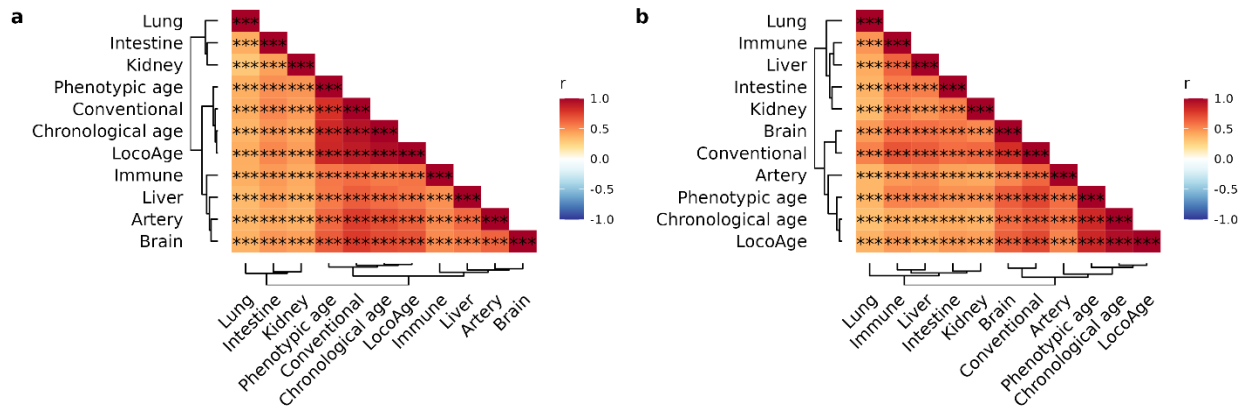

**Supplementary Figure 8. Organ-specific aging models correlate with the conventional model, chronological age, phenotypic age and locomotor age.** **a.** Heatmap showing the correlation coefficients ( $r$ ) for the predicted ages by the organ-specific 1<sup>st</sup>-generation aging models, the conventional 1<sup>st</sup>-generation aging model, and chronological age ( $n = 53,015$  UK Biobank participants), as well as phenotypic age ( $n = 44,901$  UK Biobank participants) and LocoAge ( $n = 10,428$  UK Biobank participants). **b.** Heatmap showing the correlation coefficients ( $r$ ) for the predicted relative log(hazards) of mortality by the mortality-based organ-specific aging models, the conventional mortality-based aging model, and chronological age ( $n = 53,015$  UK Biobank participants), as well as phenotypic age ( $n = 44,901$  UK Biobank participants) and LocoAge ( $n = 10,428$  UK Biobank participants).

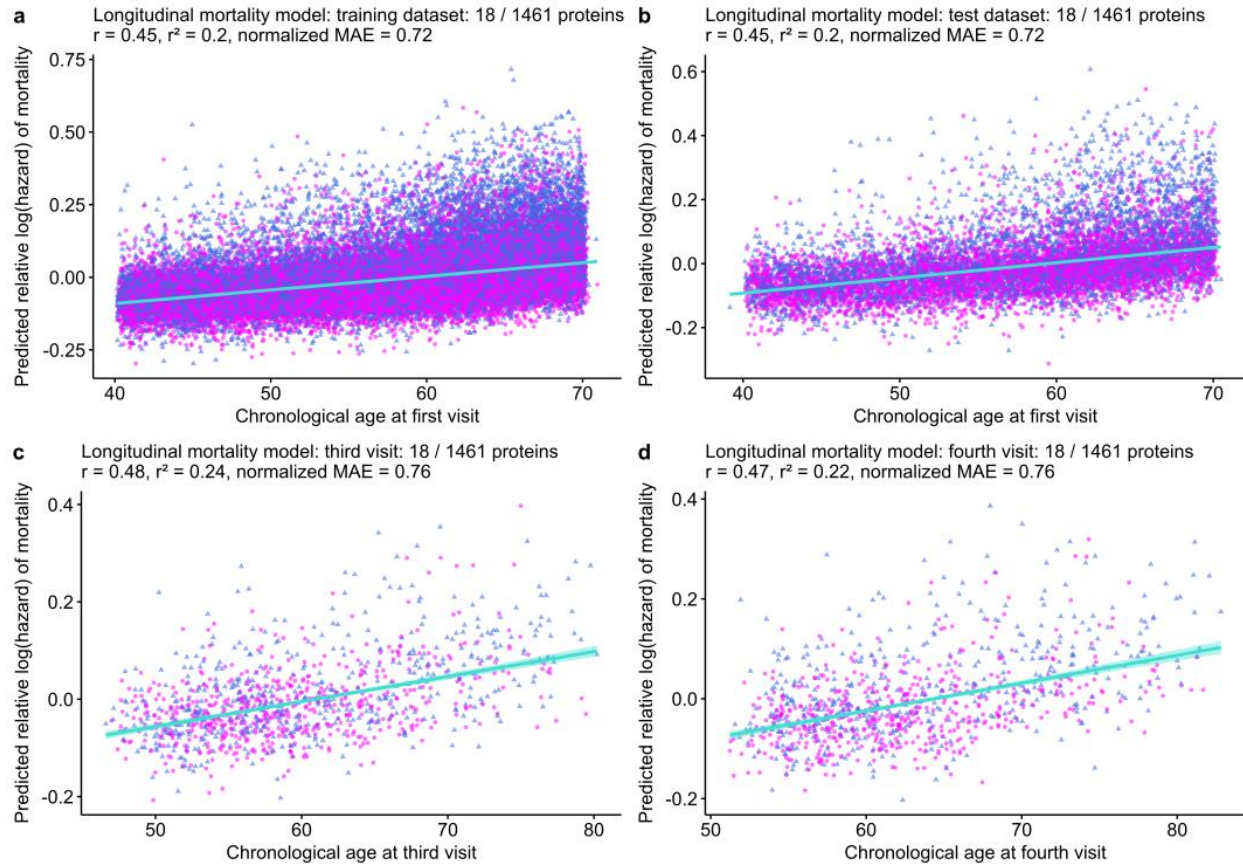

**Supplementary Figure 9. Longitudinal mortality-based models associate with chronological age. a.** Relative log(hazard) of mortality as predicted by the conventional longitudinal mortality-based aging model correlates positively with chronological age in the training dataset ( $n = 42,412$  UK Biobank participants). **b.** Relative log(hazard) of mortality as predicted by the conventional longitudinal mortality-based aging model correlates positively with chronological age in the test dataset ( $n = 10,603$  UK Biobank participants). **c.** Relative log(hazard) of mortality as predicted by the conventional longitudinal mortality-based aging model correlates positively with chronological age for the  $n = 1132$  UK Biobank participants that have proteomics data available for their third visit. **d.** Relative log(hazard) of mortality as predicted by the conventional longitudinal mortality-based aging model correlates positively with chronological age for the  $n = 1006$  UK Biobank participants that have proteomics data available for their fourth visit.  $r$ : correlation coefficient,  $r^2$ : coefficient of determination, normalized MAE: mean absolute error of the normalized residuals, magenta: women, blue: men. Robust regression lines with 95% confidence bands (shaded area) are added.



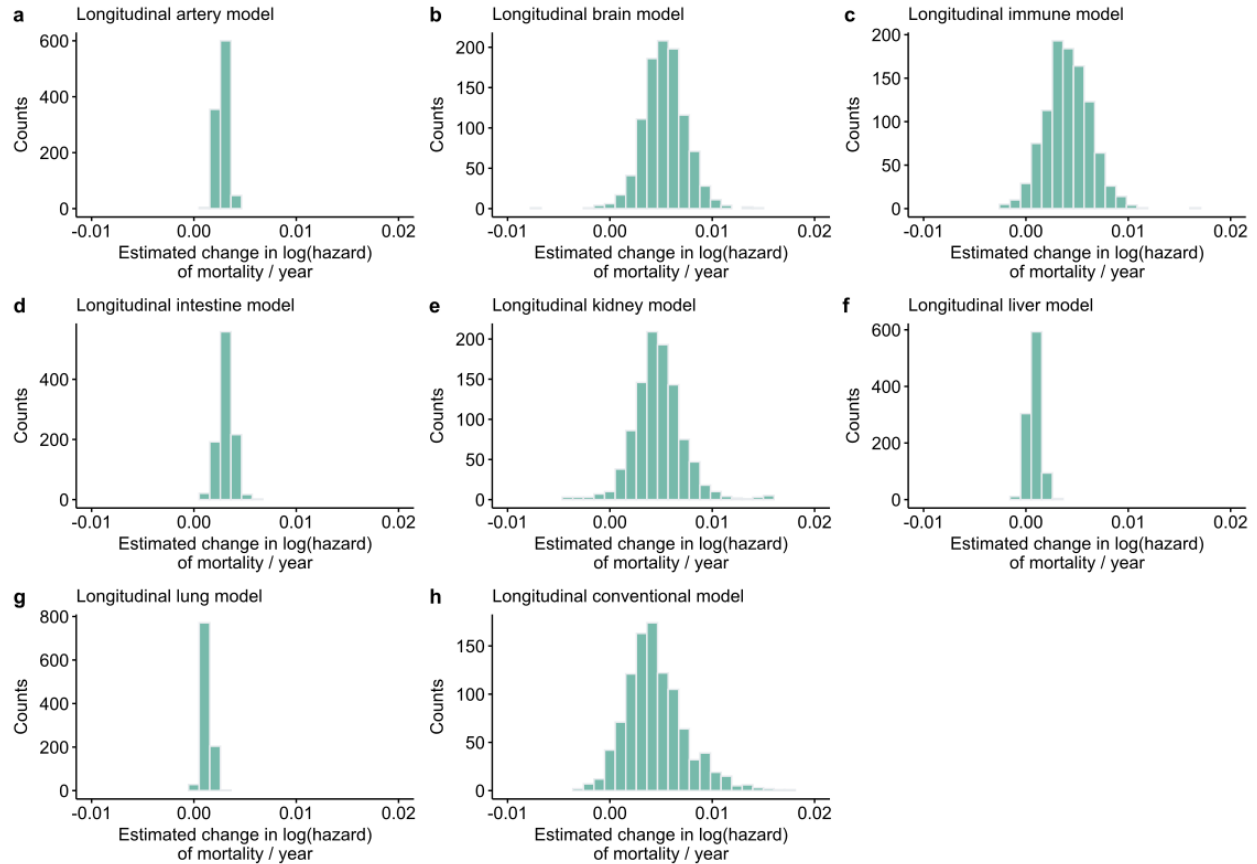

**Supplementary Figure 10. The estimated rates of aging as measured by longitudinal mortality-based aging models are mostly positive.** The histograms show the distributions of the slopes of the biological ages predicted by the conventional and organ-specific mortality-based models for the  $n = 1,006$  individuals that have proteomics data available for their first, third and fourth visits.

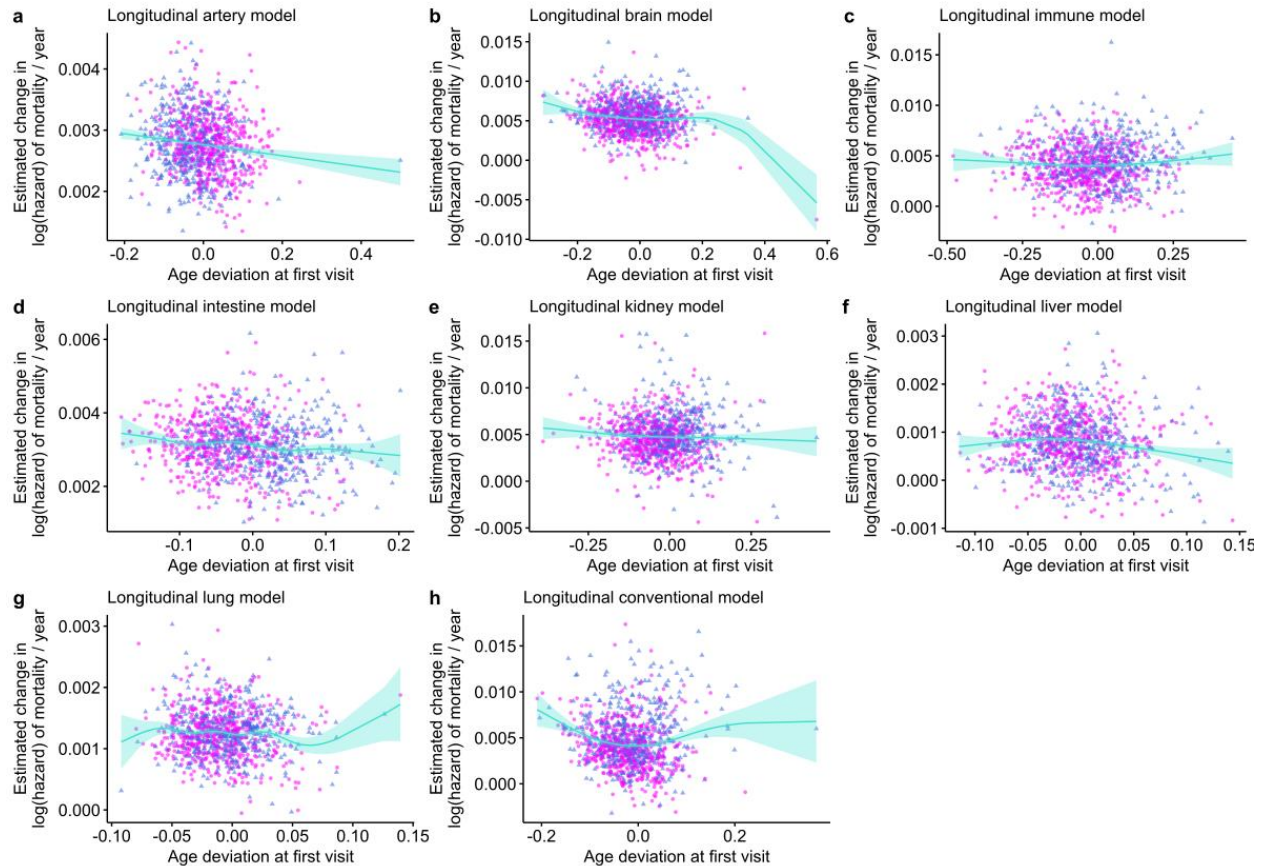

**Supplementary Figure 11. For most organ-specific mortality-based models, there is no clear association between the age deviation at first visit and the rate of aging.** Effects of age deviation at first visit on the rate of aging as measured by longitudinal mortality-based aging models.

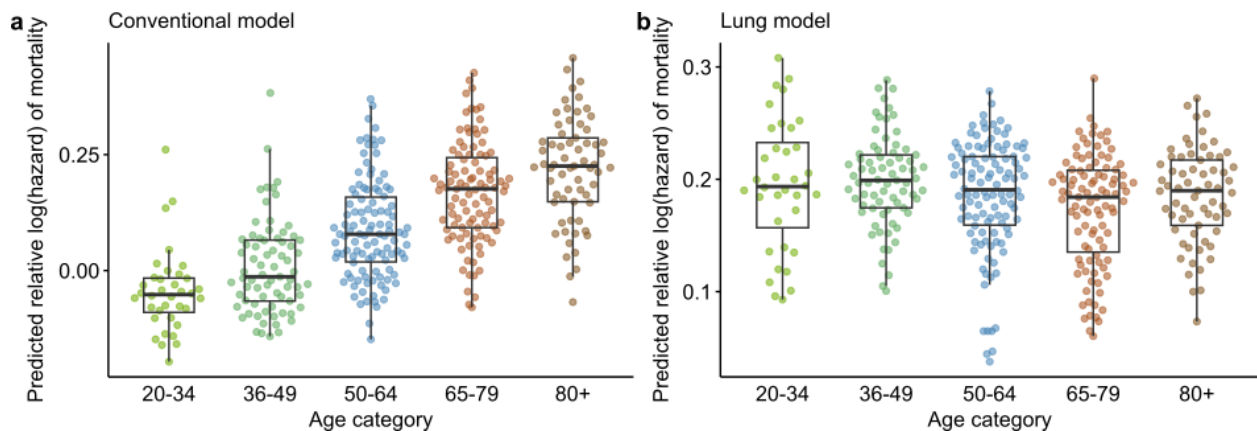

**Supplementary Figure 12. The conventional, but not the lung-specific mortality-based model associate with chronological age.** **a.** Data is from the Filbin et al. (2021) dataset. The mortality hazard predicted by the conventional model strongly associates with age (ordinary least squares  $p$  value  $< 1 \times 10^{-16}$ ,  $r = 0.62$ ). **b.** The mortality hazard predicted by the lung model shows a slightly negative significant age association (ordinary least squares  $p$  value = 0.01,  $r = 0.13$ ).

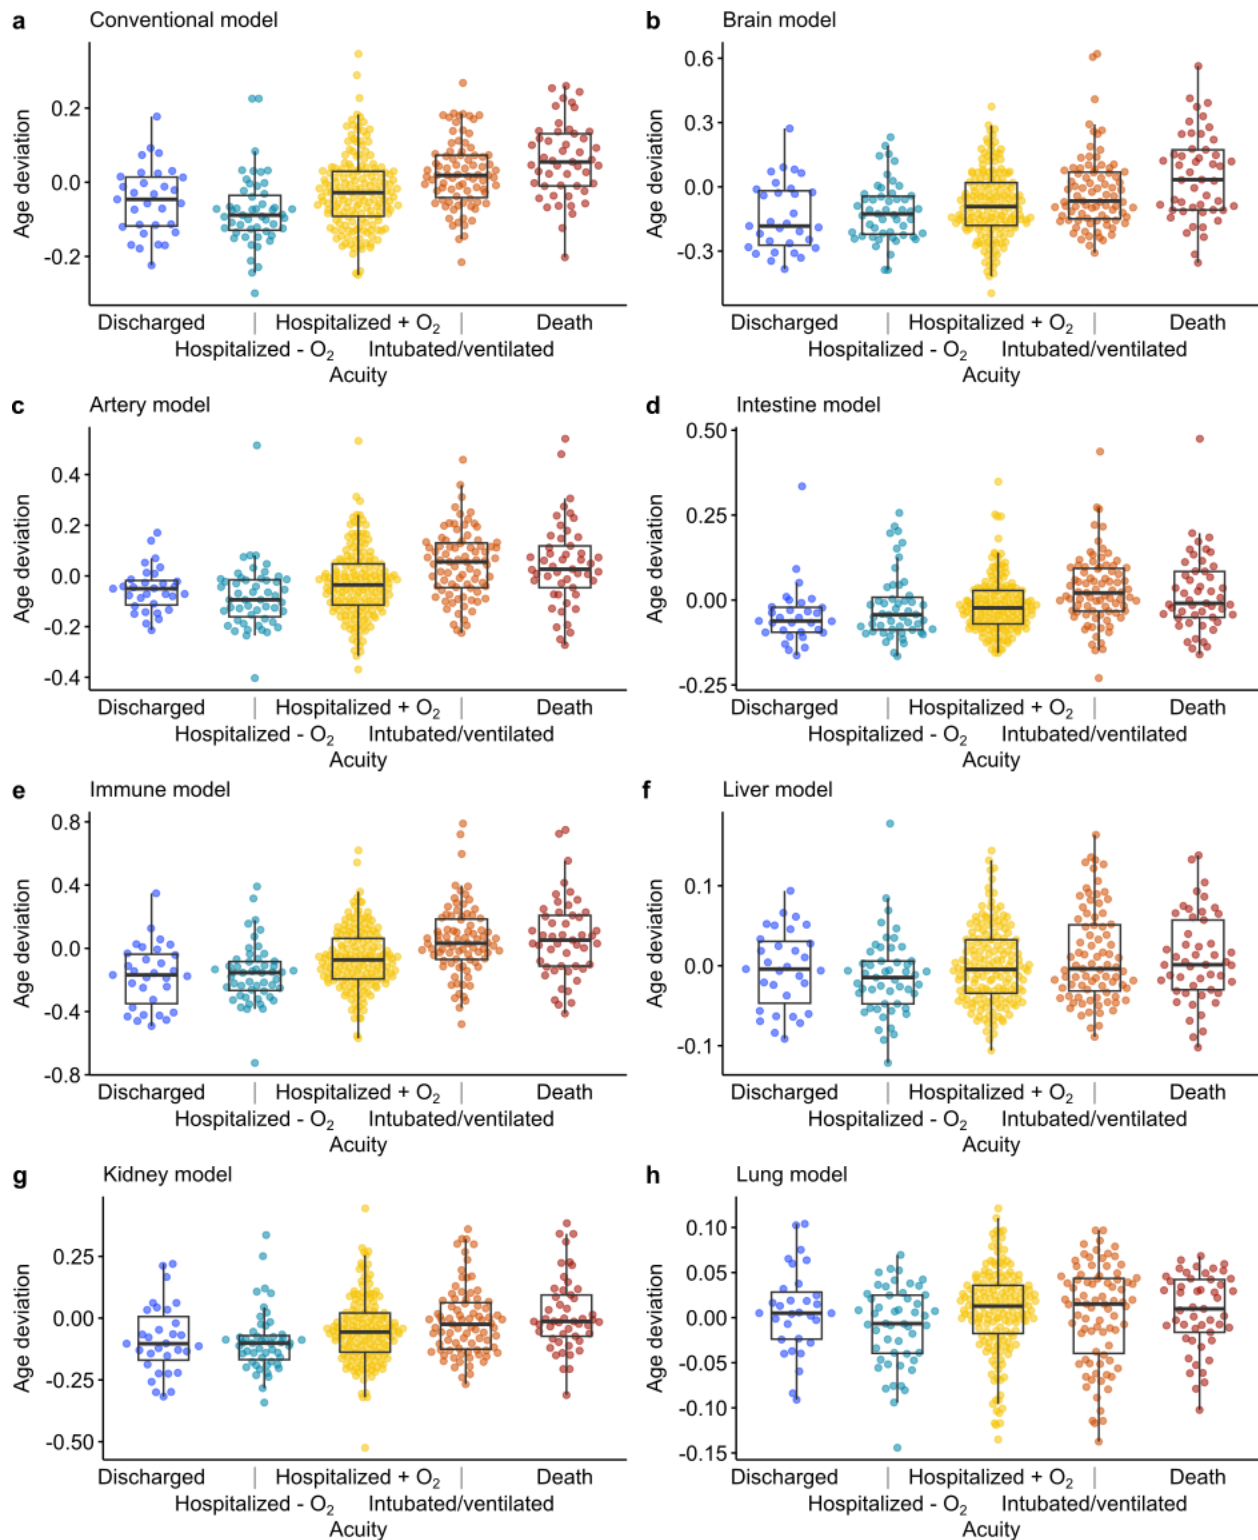

**Supplementary Figure 13. Biological age deviations as predicted by the conventional mortality-based model and all organ-specific models except lung associate with increased COVID severity.**

Ordinary linear regression p-values with Hommel correction:  $2 \times 10^{-12}$  (conventional model),  $7 \times 10^{-9}$  (brain model),  $9 \times 10^{-8}$  (artery model),  $1 \times 10^{-4}$  (intestine model),  $5 \times 10^{-12}$  (immune model), 0.02 (liver model),  $1 \times 10^{-5}$  (kidney model), and 0.5 (lung model). “Discharged”: patients not hospitalized and survived to 28 days ( $n =$

31), “hospitalized - O<sub>2</sub>”: patients hospitalized, but no supplementary oxygen required and survived to 28 days ( $n = 51$ ), “hospitalized + O<sub>2</sub>”: patients hospitalized, but supplementary oxygen was required and survived to 28 days ( $n = 169$ ), “Intubated/ventilated”: patients hospitalized and intubated and/or ventilated, and survived to 28 days ( $n = 83$ ). “Death”: patients died within 28 days ( $n = 49$ ).

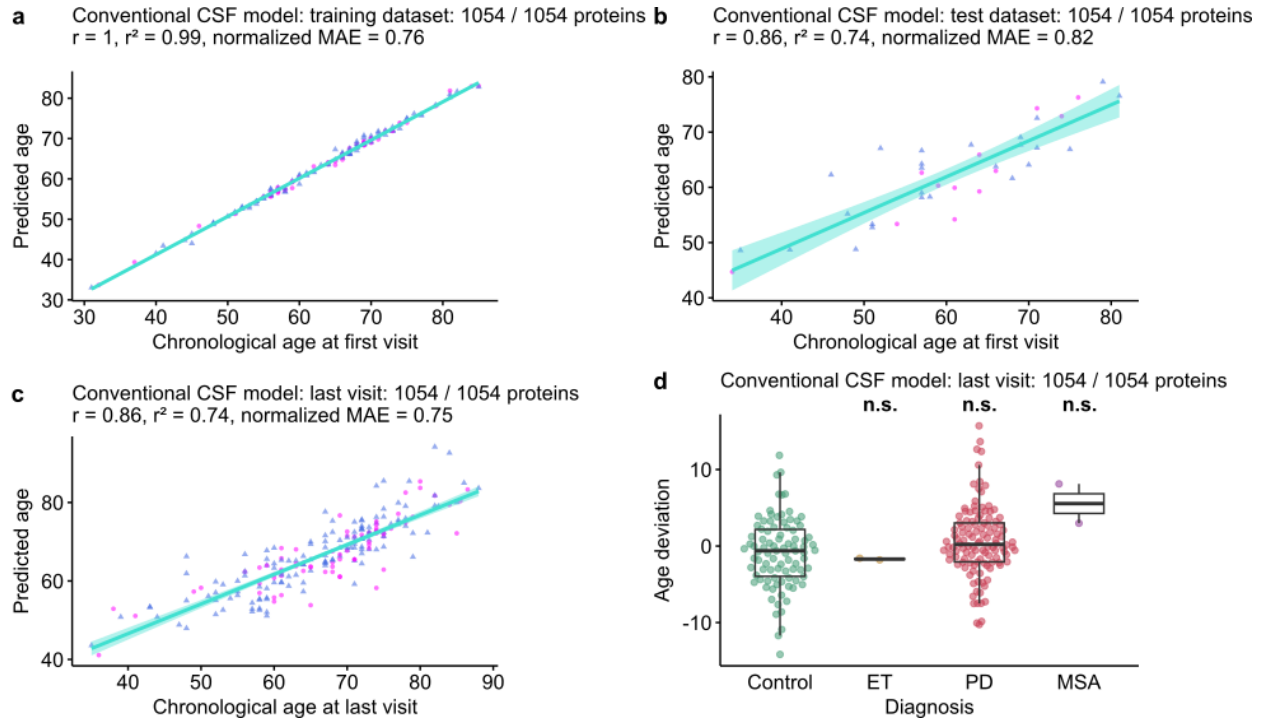

**Supplementary Figure 14. Performance of a conventional chronological aging model trained on the CSF proteome.** Data is from the Dammer et al. (2022) dataset. **a – b.** Biological ages predicted by the conventional aging model trained on CSF data correlate positively with chronological age in the CSF training and test samples ( $n = 147$  and  $37$  individuals for the training and test datasets, respectively). The number of proteins with non-zero coefficients is shown as a fraction of the total number of proteins on which the models are trained.  $r$ : correlation coefficient,  $r^2$ : coefficient of determination, normalized MAE: mean absolute error of the normalized residuals, magenta: women, blue: men. Robust regression lines with 95% confidence bands (shaded area) are added. **c.** Biological ages predicted by the conventional aging model trained on CSF data correlate positively with chronological age in the CSF samples taken at the last visit ( $n = 212$  individuals).  $r$ : correlation coefficient,  $r^2$ : coefficient of determination, normalized MAE: mean absolute error of the normalized residuals, magenta: women, blue: men. Robust regression lines with 95% confidence bands (shaded area) are added. **d.** Biological ages predicted by the conventional aging model trained on CSF data do not differ significantly in age deviation in the essential tremor (ET) group ( $n = 2$  individuals), the Parkinson’s disease (PD) group ( $n = 118$  individuals), and the multiple systems atrophy (MSA) group ( $n = 2$  individuals), as compared to the control group ( $n = 90$  individuals) (single-step-adjusted  $p = 1$ ,  $0.07$ , and  $0.1$ , respectively).

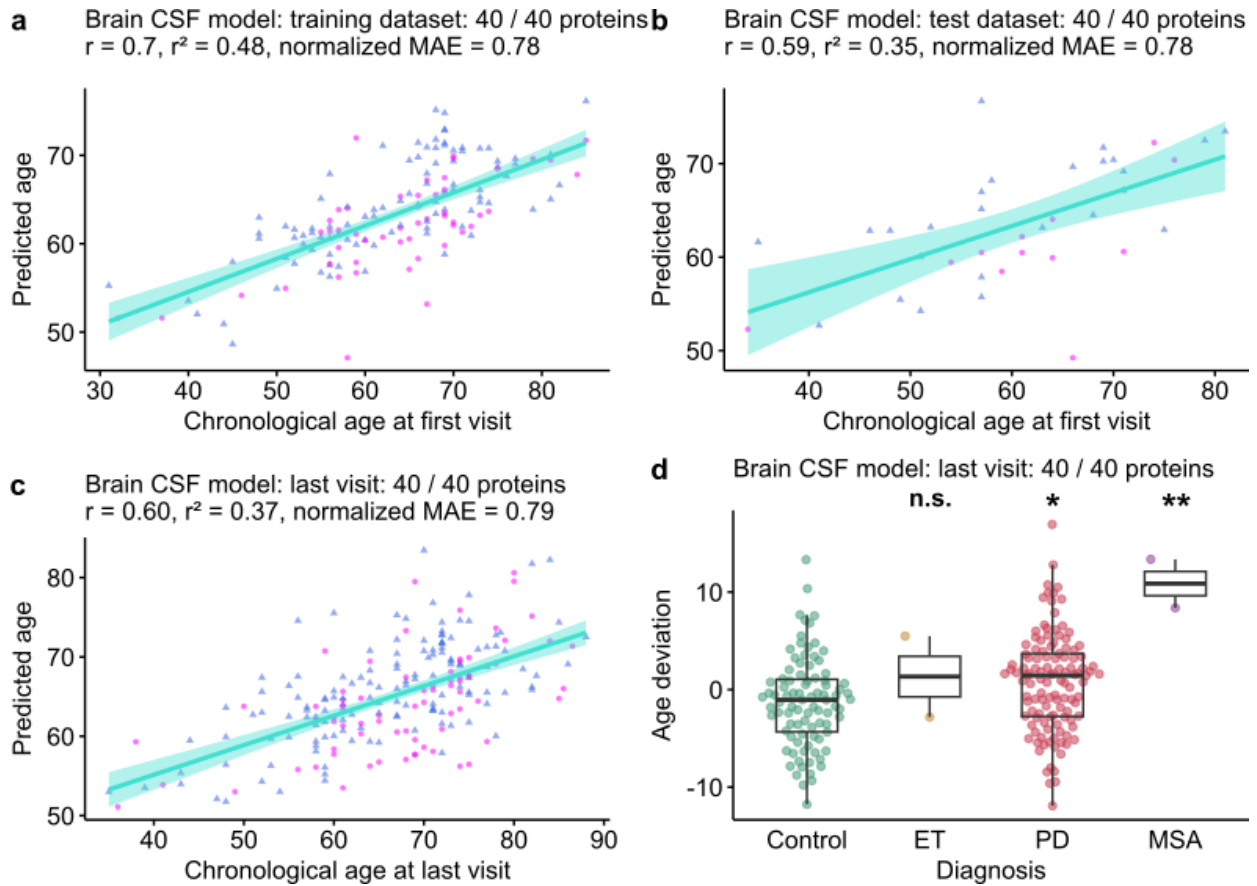

**Supplementary Figure 15. Performance of a brain-specific chronological aging model trained on the CSF proteome.** Data is from the Dammer et al. (2022) dataset. **a – b.** Biological ages predicted by the brain-specific aging model trained on CSF data correlate positively with chronological age in the CSF training and test samples ( $n = 147$  and  $37$  individuals for the training and test datasets, respectively). The number of proteins with non-zero coefficients is shown as a fraction of the total number of proteins on which the models are trained.  $r$ : correlation coefficient,  $r^2$ : coefficient of determination, normalized MAE: mean absolute error of the normalized residuals, magenta: women, blue: men. Robust regression lines with 95% confidence bands (shaded area) are added. **c.** Biological ages predicted by the brain-specific aging model trained on CSF data correlate positively with chronological age in the CSF samples taken at the last visit ( $n = 212$  individuals).  $r$ : correlation coefficient,  $r^2$ : coefficient of determination, normalized MAE: mean absolute error of the normalized residuals, magenta: women, blue: men. Robust regression lines with 95% confidence bands (shaded area) are added. **d.** Biological ages predicted by the brain-specific aging model trained on CSF data do not differ significantly in age deviation in the essential tremor (ET) group ( $n = 2$  individuals), the Parkinson's disease (PD) group ( $n = 118$  individuals), and the multiple systems atrophy (MSA) group ( $n = 2$  individuals), as compared to the control group ( $n = 90$  individuals) (single-step-adjusted  $p = 0.8, 0.01, \text{ and } 0.002$ , respectively).

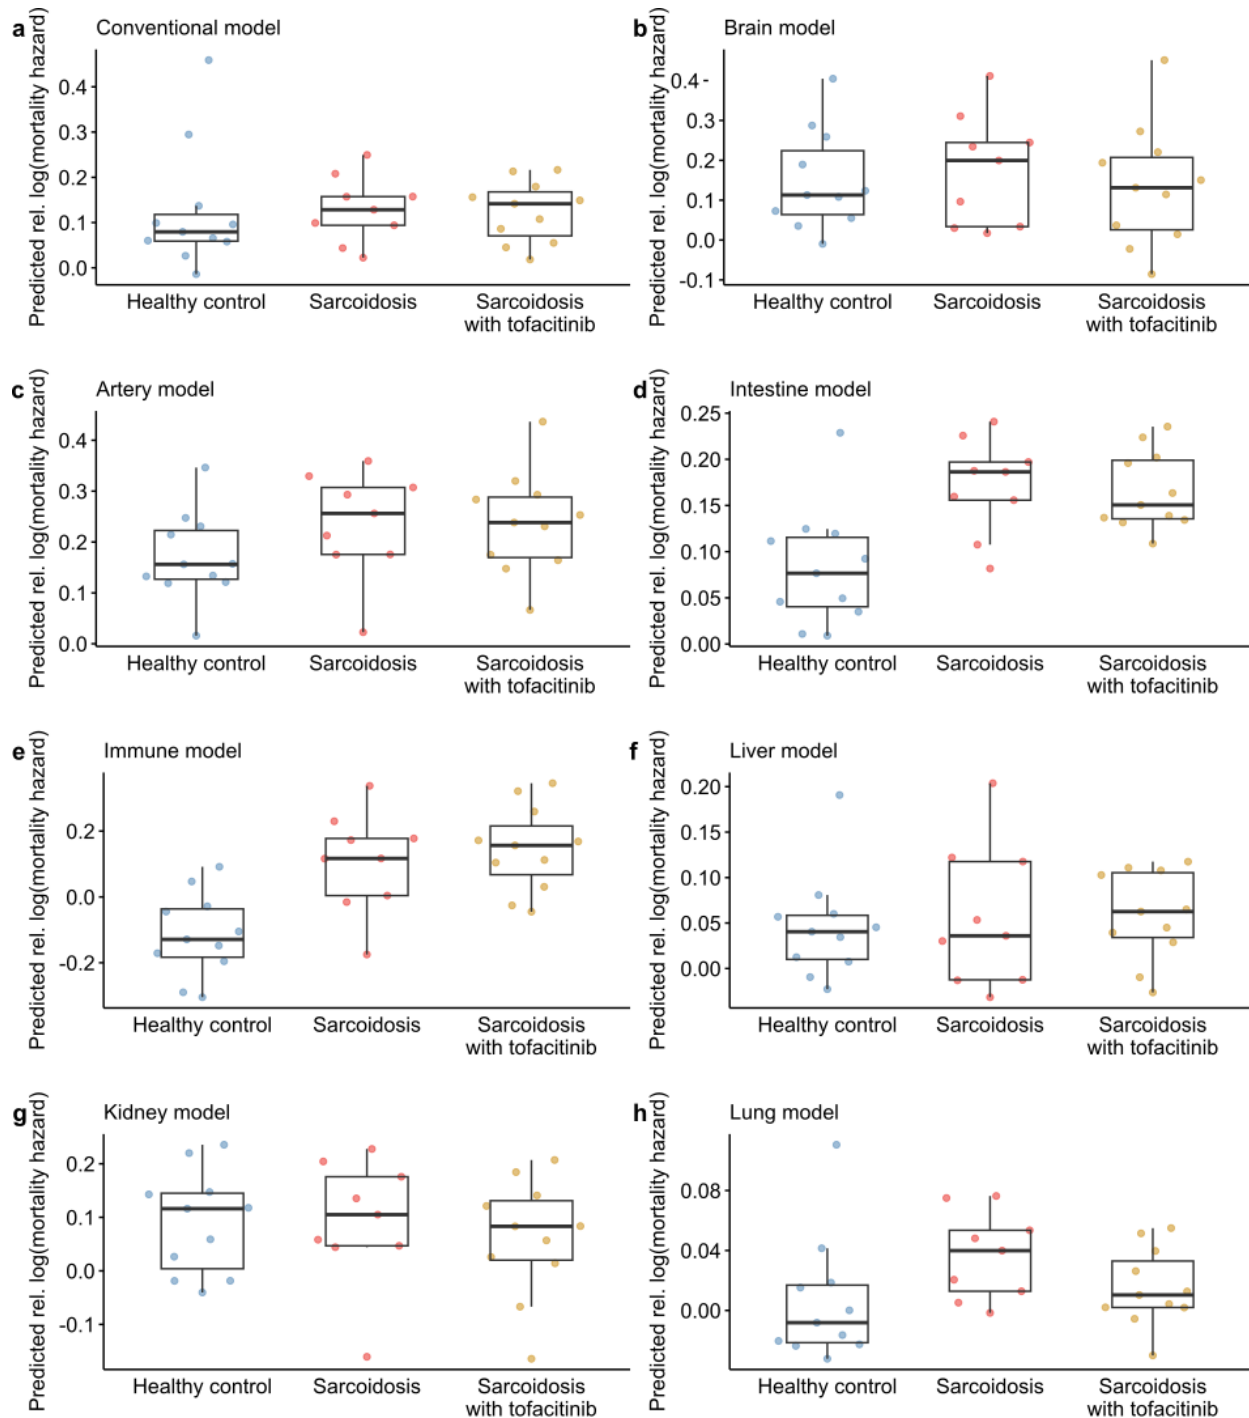

**Supplementary Figure 16. The mortality-based immune and intestine aging models associate with sarcoidosis.** Relative log(hazards) of mortality as predicted by the mortality-based conventional and organ-specific aging models based on the plasma proteomics of 11 healthy controls, 9 untreated sarcoidosis patients, and 11 sarcoidosis patients treated with tofacitinib, measured with the Olink Explore 1536 platform in the dataset of Damsky et al. (2022). Ordinary linear regression p-values with Hommel correction for the comparison sarcoidosis with or without tofacitinib vs healthy controls: 0.9 (conventional model), 0.9 (brain model), 0.4 (artery model), 0.001 (intestine model), 0.001 (immune model), 0.9 (liver model), 0.9 (kidney model), and 0.6 (lung model).
